# Supplementary material for: A Novel Chitosan Nanosponge as a Vehicle for Transepidermal Drug Delivery
Source: MDPI journal article supplement (doi:10.3390/pharmaceutics13091329), 2021-08-25
Supplement: s1 [file s1]

## Supplementary Material: A Novel Chitosan Nanosponge as a Vehicle for Transepidermal Drug Delivery

Jin Sil Lee, Hyeryeon Oh, Sunghyun Kim, Jeung-Hoon Lee, Yong Chul Shin and Won Il Choi

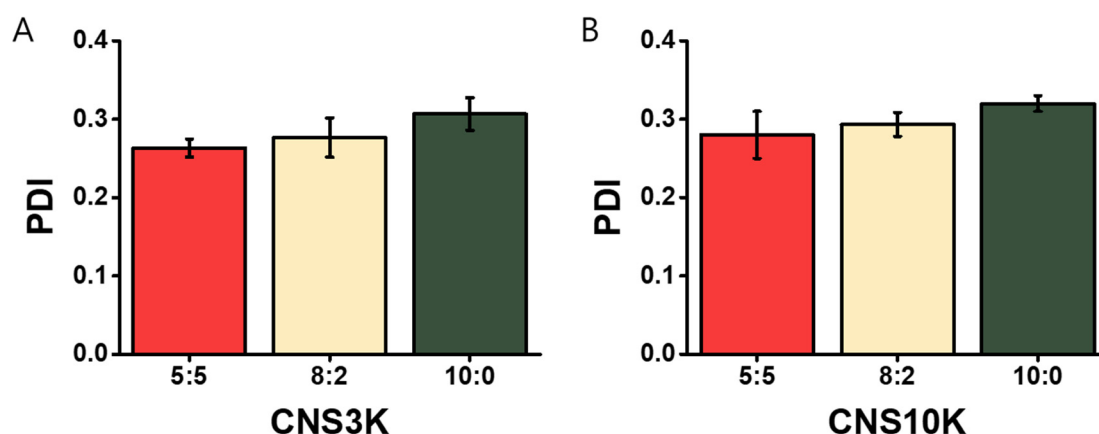

**Figure S1.** Polydispersity index (PDI) of (A) CNS3K and (B) CNS10K with different chitosan-poloxamer conjugate to poloxamer ratios.

Morphology analysis of CNS. For the analysis of the morphology of CNSs, the CNS3K and CNS10K with an optimized ratio (8:2) were dropped onto a TEM grid with a 200-mesh carbon film and air-dried for 2 days. Then, they were observed by transmission electron microscopy (TEM; JEM-2100Plus, JEOL, Tokyo, Japan). As shown in Figure S2, the morphologies of CNS3K and CNS10K were spherical-like, and the diameters of CNSs were around 100 to 150 nm, similar to those measured by DLS.

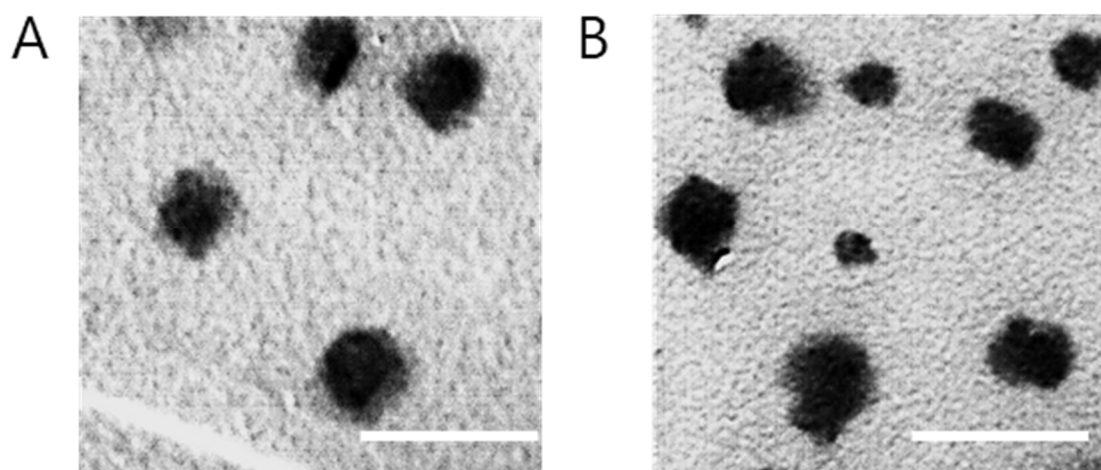

**Figure S2.** TEM images of (A) CNS3K and (B) CNS10K. The scale bar indicates 200 nm.
